# Supplementary material
Source: publisher figshare collection journal article supplement (https://asha.figshare.com/articles/dataset/_/14963787)
Supplement: Supplementary file 2 [file 1]

**Supplemental Material 2.** Frequency and percentage of each error type and number and percentage of children who produced each error type by age and language status.

|                      | Children with typical language |                   |                    |               | Children with language impairment |                   |                    |               |
|----------------------|--------------------------------|-------------------|--------------------|---------------|-----------------------------------|-------------------|--------------------|---------------|
|                      | Frequency of errors            | % of total errors | Number of children | % of children | Frequency of errors               | % of total errors | Number of children | % of children |
| <i>6-Year-Olds</i>   |                                |                   |                    |               |                                   |                   |                    |               |
| Tense marker         | 152                            | 44%               | 41                 | 82%           | 181                               | 49%               | 11                 | 100%          |
| Grammatical morpheme | 75                             | 21%               | 38                 | 76%           | 74                                | 20%               | 11                 | 100%          |
| Argument structure   | 35                             | 10%               | 20                 | 40%           | 30                                | 8%                | 9                  | 82%           |
| Pronoun              | 9                              | 3%                | 7                  | 14%           | 33                                | 9%                | 6                  | 55%           |
| Other                | 77                             | 22%               | 37                 | 74%           | 51                                | 14%               | 10                 | 91%           |
| Total                | 348                            | 100%              | —                  | —             | 369                               | 100%              | —                  | —             |
| <i>8-Year-Olds</i>   |                                |                   |                    |               |                                   |                   |                    |               |
| Tense marker         | 73                             | 34%               | 32                 | 64%           | 159                               | 54%               | 16                 | 94%           |
| Grammatical morpheme | 52                             | 25%               | 28                 | 56%           | 55                                | 19%               | 16                 | 94%           |
| Argument structure   | 14                             | 7%                | 12                 | 24%           | 17                                | 6%                | 10                 | 59%           |
| Pronoun              | 10                             | 5%                | 9                  | 18%           | 16                                | 5%                | 9                  | 53%           |
| Other                | 62                             | 29%               | 10                 | 20%           | 46                                | 16%               | 16                 | 94%           |
| Total                | 211                            | 100%              | —                  | —             | 293                               | 100%              | —                  | —             |

*Note.* Grammatical morpheme refers to omission or incorrect uses of grammatical morphemes other than pronominal forms and tense markers.
